# Supplementary material
Source: PubMed Central journal article supplement (PMC3652470)
Supplement: NIHMS317370-supplement-1_si_001.pdf [file NIHMS317370-supplement-1_si_001.pdf]

# Supporting Information for “ $\lambda$ -meta dynamics approach to compute absolute solvation free energy”

*Pan Wu, Xiangqian Hu\*, Weitao Yang\**

Department of Chemistry, Duke University, 27708

AUTHOR EMAIL ADDRESS [xqhu@duke.edu](mailto:xqhu@duke.edu) and [weitao.yang@duke.edu](mailto:weitao.yang@duke.edu)

## I. Supporting figures

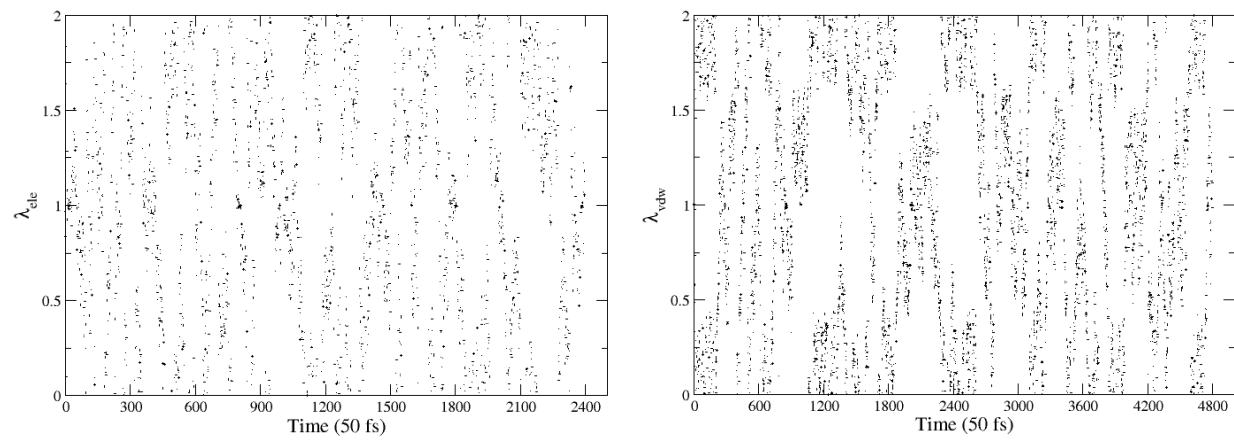

**Figure S1.** Trajectories of  $\lambda_{ele}$  and  $\lambda_{vdw}$  during  $\lambda$ -metadynamics for methanol.

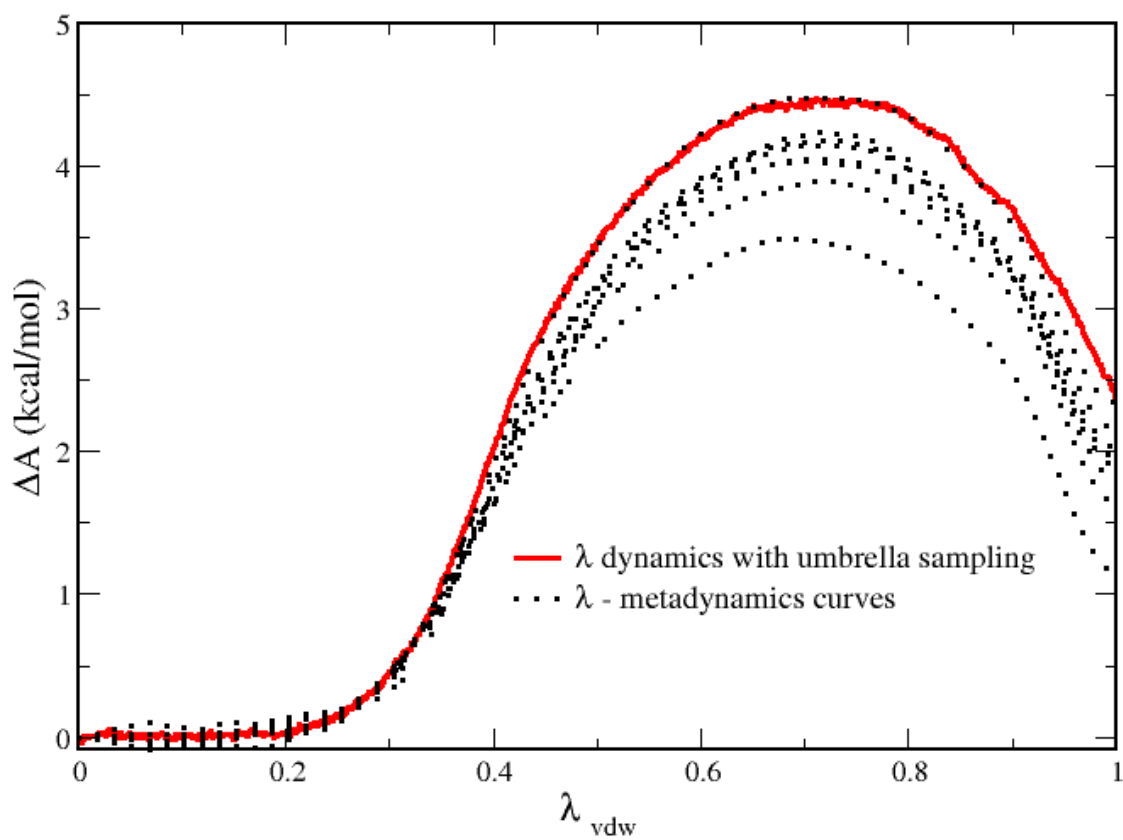

**Figure S2.** PMFs of  $\lambda_{vdw}$  from eight independent  $\lambda$ -metadynamics (dashed black lines) and from  $\lambda$  dynamics with umbrella sampling (read solid line) for methanol.

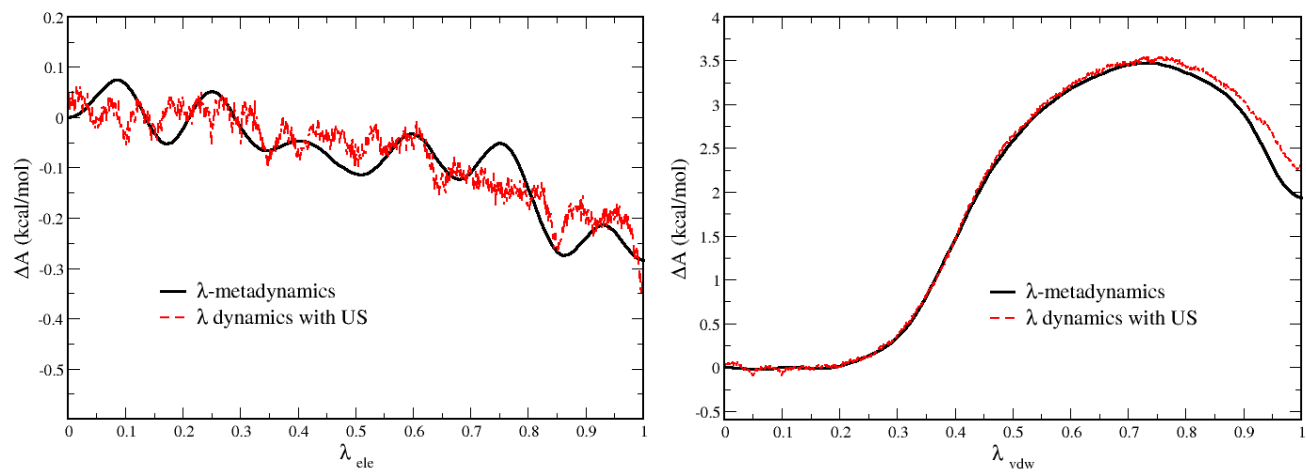

Figure S3. PMFs from  $\lambda$ -metadynamics and umbrella sampling for methane

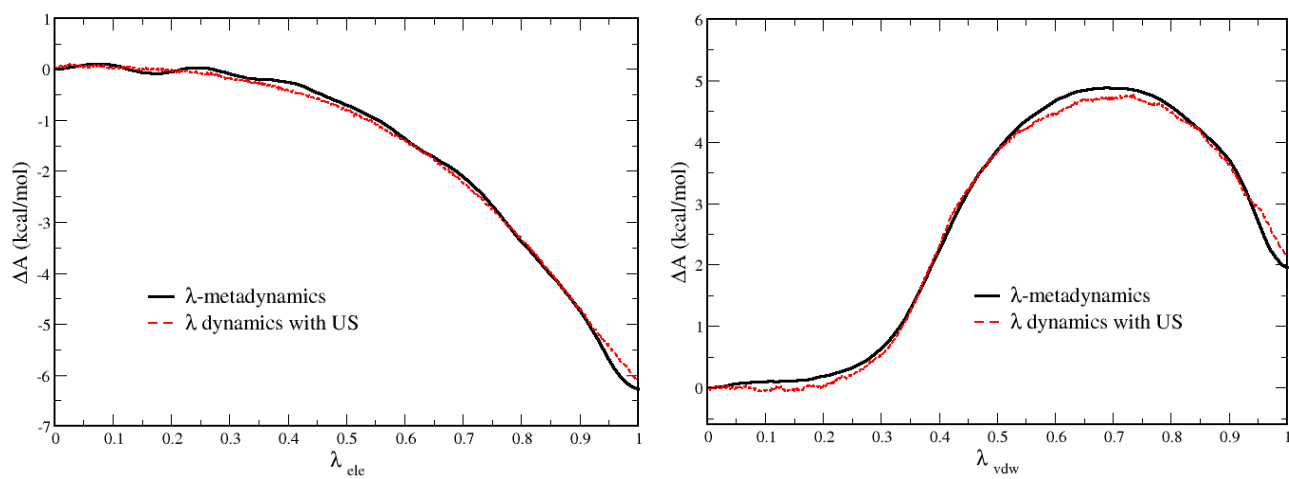

Figure S4. PMFs from  $\lambda$ -metadynamics and umbrella sampling for methylamine

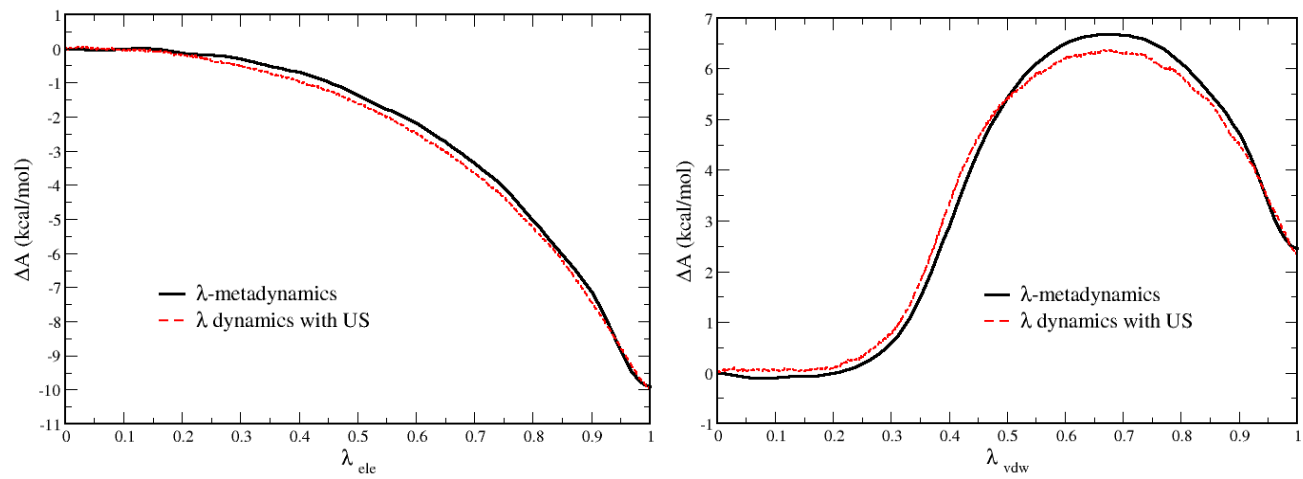

Figure S5. PMFs from  $\lambda$ -metadynamics and umbrella sampling for acetamide

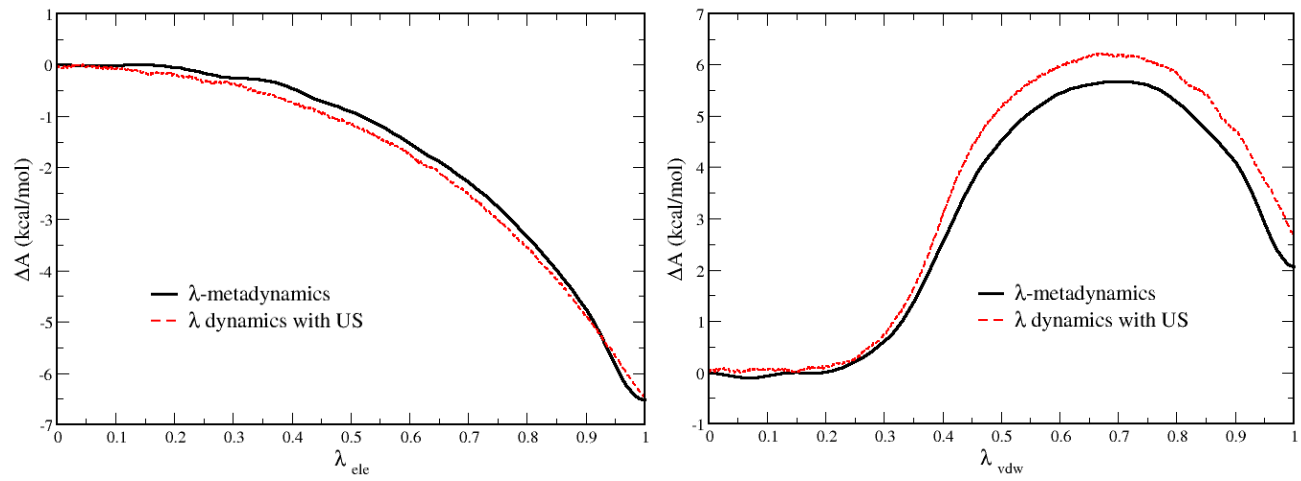

Figure S6. PMFs from  $\lambda$ -metadynamics and umbrella sampling for acetic acid
